# Supplementary material
Source: PubMed Central journal article supplement (PMC5531181)
Supplement: NIHMS882684-supplement-Supplementary_Appendix.pdf [file NIHMS882684-supplement-Supplementary_Appendix.pdf]

# THE LANCET Oncology

## Supplementary appendix

This appendix formed part of the original submission and has been peer reviewed. We post it as supplied by the authors.

Supplement to: Diéras V, Miles D, Verma S, et al. Trastuzumab emtansine versus capecitabine plus lapatinib in patients with previously treated HER2-positive advanced breast cancer (EMILIA): a descriptive analysis of final overall survival results from a randomised, open-label, phase 3 trial. *Lancet Oncol* 2017; published online May 16. [http://dx.doi.org/10.1016/S1470-2045\(17\)30312-1](http://dx.doi.org/10.1016/S1470-2045(17)30312-1).

## Supplementary appendix

**Supplement to:** Diéras V, Miles D, Verma S, et al. Final overall survival results from the phase 3 EMILIA study of trastuzumab emtansine versus capecitabine plus lapatinib in patients with previously treated HER2-positive advanced breast cancer.

**Table S1: Study investigators**

| Investigator       | Site                                                                                                                                                                                                | Number of patients recruited |
|--------------------|-----------------------------------------------------------------------------------------------------------------------------------------------------------------------------------------------------|------------------------------|
| Do-Youn Oh         | Seoul National University Hospital, Korea                                                                                                                                                           | 33                           |
| Jungsil Ro         | National Cancer Center, Korea                                                                                                                                                                       | 27                           |
| Sunil Verma        | Sunnybrook Odette Cancer Centre, Canada                                                                                                                                                             | 24                           |
| Constanta Timcheva | SHATO, Sofia, Bulgaria                                                                                                                                                                              | 23                           |
| Joo-Hyuk Sohn      | Yonsei University College of Medicine, Korea                                                                                                                                                        | 21                           |
| Tadeusz Pienkowski | Centrum Onkologii, Marii Skłodowskiej-Curie Clinic, Poland                                                                                                                                          | 19                           |
| Young-Hyuck Im     | Samsung Medical Centre, Korea                                                                                                                                                                       | 17                           |
| Gilles Romieu      | Centre Val d'Aurelle Paul Lamarque-Hopital de Jour et de Sema, France                                                                                                                               | 17                           |
| Shailendra Verma   | The Ottawa Hospital, Canada                                                                                                                                                                         | 14                           |
| Jonathan Polikoff  | Kaiser Permanente, San Diego, California, USA                                                                                                                                                       | 12                           |
| Anne Armstrong     | Christie Hospital, France                                                                                                                                                                           | 12                           |
| Jens Huober        | Kantonsspital St. Gallen, Brustzentrum, Switzerland                                                                                                                                                 | 12                           |
| Lowell Hart        | Florida Cancer Specialists & Research Institute, Fort Myers, Florida, USA                                                                                                                           | 11                           |
| Mario Campone      | Ico Rene Gauducheau, France                                                                                                                                                                         | 11                           |
| Raymond Ng         | National Cancer Centre, Taiwan                                                                                                                                                                      | 11                           |
| Soo Chin Lee       | National University Hospital, Singapore                                                                                                                                                             | 11                           |
| Vladmir Semiglazov | Petrov Research Institute of Oncology, Russia                                                                                                                                                       | 11                           |
| Laurent Gressot    | Northwest Cancer Center, Houston, Texas, USA                                                                                                                                                        | 10                           |
| Louis Fehrenbacher | Kaiser Permanente, Roseville, California, USA<br>Kaiser Permanente, Walnut Creek, California, USA<br>Kaiser Permanente, Santa Clara, California, USA<br>Kaiser Permanente, Vallejo, California, USA | 10                           |

|                       |                                                                         |    |
|-----------------------|-------------------------------------------------------------------------|----|
|                       | Kaiser Permanente, San Jose, California, USA                            |    |
| Mark Verrill          | Freeman Hospital, Northern Centre for Cancer Care, United Kingdom       | 10 |
| Veronique Dieras      | Institut Curie, France                                                  | 10 |
| Kay Friedrichs        | Kooperatives Mammazentrum Hamburg Krankenhaus Jerusalem, Germany        | 10 |
| Mei-Ching Liu         | Koo Foundation Sun Vat-Sen Cancer Center, Taiwan                        | 10 |
| Noemia Afonso         | Instituto Portugues de Oncologia, Portugal                              | 10 |
| Sara Hurvitz          | UCLA Oncology, Los Angeles, California, USA                             | 9  |
| Timothy Pluard        | Siteman Cancer Center, St Louis, Missouri, USA                          | 9  |
| Giuliano Borges       | Clinica de Neoplasias Litoral, Italy                                    | 9  |
| Jose Luiz Pedrini     | Hospital Nossa, Senhora da Conceição, Brazil                            | 9  |
| Rodrigo Araujo        | Instituto Nacional do Cancer, Centro de Estudos, Brazil                 | 9  |
| Antonio Anton Torres  | Hospital Miguel Servet, Spain                                           | 9  |
| Hsien-Kun Chang       | Chang Gung Memorial Hospital, Taiwan                                    | 9  |
| David Riseberg        | Mercy Medical Center, Baltimore, Maryland, USA                          | 8  |
| Shankar Sundaram      | Sharp Healthcare, San Diego, California, USA                            | 8  |
| David Miles           | Mount Vernon Hospital Centre for Cancer Treatment, France               | 8  |
| Roberto Hegg          | Hospital Perola Bygton, Centro da Referencia da Saude da Mulher, Brazil | 8  |
| Elzbieta Staroslawska | Centrum Onkologii, Ziemi Lubelskiej, Poland                             | 8  |
| Renata Szoszkiewicz   | Wielkopolskie Centrum Onkologii, Oddzial Chemioterapii, Poland          | 8  |
| Gerd Graffunder       | Frauenarzt-Zentrum Zehlendorf, Germany                                  | 8  |
| Manuel Ruiz Borrego   | Hospital Virgen del Rocio, Spain                                        | 8  |
| Kimberly Blackwell    | Duke University Medical Center, Durham, North Carolina, USA             | 7  |
| Jacek Jassem          | Uniwersyteckie Centrum Kliniczne, Poland                                | 7  |
| Patricia Gomez Pardo  | University Hospital Vall d'Hebron, Spain                                | 7  |
| Antoaneta Tomova      | District Oncology Dispensary, Bulgaria                                  | 7  |
| Leif Klint            | Sahlgrenska Universitetssjukhuset, Sweden                               | 7  |
| Simona Borstnar       | Institute of Oncology Ljubljana, Slovenia                               | 7  |
| Denise Yardley        | Sarah Cannon Research Institute, Nashville, Tennessee, USA              | 6  |
| Sandra Swain          | Washington Cancer Institute, Washington, DC, USA                        | 6  |
| Karen Gelmon          | BC Cancer Research Centre, Canada                                       | 6  |

|                         |                                                                                              |   |
|-------------------------|----------------------------------------------------------------------------------------------|---|
| Susan Ellard            | Centre of the Southern Interior, Canada                                                      | 6 |
| Wilson Miller           | Jewish General Hospital, Canada                                                              | 6 |
| Peter Barrett-Lee       | Velindre Cancer Centre, United Kingdom                                                       | 6 |
| Thierry Delozier        | Centre Francois Baclesse, Comite Sein, France                                                | 6 |
| Fausto Roila            | Azienda Ospedaliera S. Maria, Italy                                                          | 6 |
| Francesco Cognetti      | Istituto Regina Elena, Italy                                                                 | 6 |
| Jefferson Vinholes      | CliniOnco Centro de Novos Tratamentos, Brazil                                                | 6 |
| Jeffrey Yachnin         | Malarsjukhuset, Sweden                                                                       | 6 |
| Semir Beslija           | Clinic of Oncology, Bosnia and Herzegovina                                                   | 6 |
| Adam Brufsky            | Magee-Women's Hospital, Pittsburgh, Pennsylvania, USA                                        | 5 |
| George Somlo            | City of Hope National Medical Center, Duarte, California, USA                                | 5 |
| James Knost             | Illinois Cancer Care, Peoria, Illinois, USA                                                  | 5 |
| Mansoor Saleh           | Georgia Cancer Specialists, Atlanta, Georgia, USA                                            | 5 |
| Melody Cobleigh         | Rush University Medical Center, Chicago, Illinois, USA                                       | 5 |
| Teresa Helsten          | UC San Diego Moores Cancer Center, San Diego, California, USA                                | 5 |
| Thomas Budd             | Cleveland Clinic Foundation, Cleveland, Ohio, USA                                            | 5 |
| Timothy Moore           | The Zangmeister Center, Ohio Cancer Center, Columbus, Ohio, USA                              | 5 |
| Catherine Prady         | Hôpital Charles Lemoyne, Canada                                                              | 5 |
| Tallal Hussein Younis   | Capital Health, Canada                                                                       | 5 |
| Marc Debled             | Institut Bergonie, Gastroenterologie & Oncologie, France                                     | 5 |
| Nicholas Turner         | Royal Marsden Hospital, United Kingdom                                                       | 5 |
| Andrea Martoni          | Policlinco Sant'Orsola-Malpighi, Italy                                                       | 5 |
| Luca Gianni             | Istituto Nazionale per lo Studio e la Cura dei Tumori, Italy                                 | 5 |
| Carsten Hielscher       | gSUND Gynäkologie Kompetenzzentrum Stralsund, Germany                                        | 5 |
| Michael Untch           | Helios Klinikum Berlin-Buch Klinik für Gynäkologie und Geburtshilfe<br>Brustzentrum, Germany | 5 |
| Andres Redondo Sanchez  | Hospital de la Paz Madrid, Spain                                                             | 5 |
| Assen Dudov             | Oncology Center, Sofia, Bulgaria                                                             | 5 |
| Gabriel Tellez-Trevilla | Centro Oncológico Estatal, Mexico                                                            | 5 |
| Minna Tanner            | Tampere University Hospital, Finland                                                         | 5 |
| Alejandra Perez         | Memorial Cancer Institute, Hollywood, Florida, USA                                           | 4 |

|                        |                                                                                                                        |   |
|------------------------|------------------------------------------------------------------------------------------------------------------------|---|
| Daniel Budman          | North Shore-Long Island Jewish Health, Great Neck, New York, USA                                                       | 4 |
| Ian E. Krop            | Dana-Farber Cancer Institute, Boston, Massachusetts, USA<br>Massachusetts General Hospital, Boston, Massachusetts, USA | 4 |
| James Waisman          | Breastlink Medical Group, Murrieta, California, USA                                                                    | 4 |
| Mikhail Shtivelband    | Ironwood Cancer Treatment and Research, Chandler, Arizona, USA                                                         | 4 |
| Robert Hermann         | Northwest Georgia Oncology Centers, Marietta, Georgia, USA                                                             | 4 |
| Ruth M. O'Regan        | Emory University, Druid Hills, Georgia, USA                                                                            | 4 |
| Thomas Cosgriff        | Hematology and Oncology Specialists, Metairie, Louisiana, USA                                                          | 4 |
| Troy Guthrie, Jr.      | Baptist Cancer Institute, Jacksonville, Florida, USA                                                                   | 4 |
| Mark Beresford         | Bristol Oncology Centre, United Kingdom                                                                                | 4 |
| Paul Ellis             | St. Thomas Hospital, United Kingdom                                                                                    | 4 |
| Tamas Hickish          | Royal Bournemouth General Hospital, United Kingdom<br>Poole General Hospital, United Kingdom                           | 4 |
| Corrado Boni           | Arcispedale Santa Maria Nuova, Servizio di Oncologia, Italy                                                            | 4 |
| Diana Crivellari       | Centro di Riferimento Oncologico, Italy                                                                                | 4 |
| Dino Amadori           | Istituto Scientifico Romagnolo per lo Studio e la Cura dei Tumori, Italy                                               | 4 |
| Giuseppe Curigliano    | Istituto Europeo di Oncologia, Italy                                                                                   | 4 |
| Helio Pinczowski       | Centro de Oncologia e Hematologia da Faculdade de Medicina, Italy                                                      | 4 |
| Manfred Welslau        | Studienzentrum, Germany                                                                                                | 4 |
| Peter Klare            | Gemeinschaftspraxis Dres. Klare, Kittel, Müller, und Wetzlar, Germany                                                  | 4 |
| Kun-Ming Rau           | Kaohsiung Chang Gung Memorial Hospital, Taiwan                                                                         | 4 |
| Marcelino Gaytan-Angel | Centro de Investigacion, Clinica del Pacifico, Mexico                                                                  | 4 |
| Tuomo Alanko           | Docrates Clinic, Finland                                                                                               | 4 |
| Christopher Ruud       | Scott & White Hospital, Temple, Texas, USA                                                                             | 3 |
| David Berd             | Eastern Regional Medical Center, Philadelphia, Pennsylvania, USA                                                       | 3 |
| David Henry            | Pennsylvania Oncology Hematology Associates, Philadelphia, Pennsylvania, USA                                           | 3 |
| Grace Wang             | Advanced Medical Specialties, Miami, Florida, USA                                                                      | 3 |
| Jonathon Goldberg      | Northern Westchester Hospital Cancer Treatment and Wellness Center, Mt. Kisco, New York, USA                           | 3 |
| Joseph Baar            | University Hospitals of Cleveland, Cleveland, Ohio, USA                                                                | 3 |

|                         |                                                                                                                                                                                                         |   |
|-------------------------|---------------------------------------------------------------------------------------------------------------------------------------------------------------------------------------------------------|---|
| Marc L. Citron          | ProHEALTH Care Associates, Lake Success, New York, USA                                                                                                                                                  | 3 |
| Ravi Patel              | Comprehensive Blood & Cancer Center, Bakersfield, California, USA                                                                                                                                       | 3 |
| Sanjiv Modi             | Joliet Oncology Hematology Associates, Joliet, Illinois, USA                                                                                                                                            | 3 |
| Shaker Dakhil           | Cancer Center of Kansas, Wichita, Kansas, USA                                                                                                                                                           | 3 |
| Steven Limentani        | Carolinas Hematology-Oncology Associates, Charlotte, North Carolina, USA                                                                                                                                | 3 |
| Theodore Walters        | St. Luke's Mountain States Tumor Institute, Boise, Idaho, USA<br>St. Luke's Mountain States Tumor Institute, Twin Falls, Idaho, USA<br>St. Luke's Mountain States Tumor Institute, Meridian, Idaho, USA | 3 |
| Seock Ah Im             | Seoul National University Hospital, Korea                                                                                                                                                               | 3 |
| Frank Priou             | Les Oudairies-Hematologie & Oncologie, France                                                                                                                                                           | 3 |
| Helene Simon            | Hôpital Morvan, France                                                                                                                                                                                  | 3 |
| Antonio Contu           | Ospedale Civile, Italy                                                                                                                                                                                  | 3 |
| Ruffo Freitas Júnior    | Hospital Araujo Jorge, Brazil                                                                                                                                                                           | 3 |
| Sabino De Placido       | Universita Fredrico II, Italy                                                                                                                                                                           | 3 |
| Jerzy Zaluski           | Wielkopolskie Centrum Onkologii, Poland                                                                                                                                                                 | 3 |
| Georg Heinrich          | Schwerpunktpraxis, Germany                                                                                                                                                                              | 3 |
| Holger Eidtmann         | Universitätsklinikum Schleswig-Holstein, Germany                                                                                                                                                        | 3 |
| Antonio Llombart        | Hospital Arnau de Vilanova, Spain                                                                                                                                                                       | 3 |
| Serafin Morales Murillo | Hospital Arnau de Vilanova, Spain                                                                                                                                                                       | 3 |
| Violina Taskova         | MHAT Sveta Anna, Bulgaria                                                                                                                                                                               | 3 |
| Hwei-Chung Wang         | China Medical University Hospital, Taiwan                                                                                                                                                               | 3 |
| Janice Tsang            | Queen Mary Hospital, Hong Kong                                                                                                                                                                          | 3 |
| Anisa Hassan            | Freeman Cancer Institute, Joplin, Missouri, USA                                                                                                                                                         | 2 |
| Brian Dicarlo           | Central Coast Medical Oncology, Santa Maria, California, USA                                                                                                                                            | 2 |
| Elaina Gartner          | Wayne State University, Detroit, Michigan, USA                                                                                                                                                          | 2 |
| Francis Senecal         | Northwest Medical Specialties, Tacoma, Washington, USA                                                                                                                                                  | 2 |
| Ines Sanchez            | Texas Oncology, El Paso, Texas, USA                                                                                                                                                                     | 2 |
| Ira Oliff               | Orchard Research, New York, NY, USA                                                                                                                                                                     | 2 |
| John Charlson           | Medical College of Wisconsin, Milwaukee, Wisconsin, USA                                                                                                                                                 | 2 |
| Luis Meza               | Cancer Center of Acadiana at Lafayette, Lafayette, Louisiana, USA                                                                                                                                       | 2 |

|                           |                                                                        |   |
|---------------------------|------------------------------------------------------------------------|---|
| Pearl Seo                 | University of Miami Health System, Miami, Florida, USA                 | 2 |
| Richard Frank             | Norwalk Hospital, Norwalk, Connecticut, USA                            | 2 |
| Richard Orłowski          | Carolina Oncology Specialists, PA, Durham, North Carolina, USA         | 2 |
| Richy Agajanian           | The Oncology Institute of Hope and Innovation, Downey, California, USA | 2 |
| Rita Blanchard            | Boston Medical Center, Boston, Massachusetts, USA                      | 2 |
| Robert Somer              | Anderson Cancer Center at Cooper, Camden, New Jersey, USA              | 2 |
| Rupesh Parikh             | Comprehensive Cancer Centers of Nevada, Henderson, Nevada, USA         | 2 |
| Shobha Chitneni           | Hematology-Oncology Associates, Bettendorf, Iowa, USA                  | 2 |
| Stanley Waintraub         | John Theurer Cancer Center, Hackensack, New Jersey, USA                | 2 |
| Steven Papish             | Morristown Memorial Hospital, Morristown, New Jersey, USA              | 2 |
| Steven Roshon,            | North Coast Cancer Center-Cleveland Clinic, Cleveland, Ohio, USA       | 2 |
| Soo Hyeon Lee             | Yonsei University College of Medicine, Korea                           | 2 |
| Andre Robidoux            | Hôtel Dieu de Montréal, Canada                                         | 2 |
| Andrew Scarfe             | Cross Cancer Institute, Canada                                         | 2 |
| Marc Webster              | Tom Baker Cancer Centre, Canada                                        | 2 |
| Ann-Claire Hardy-Bessard  | Clinique Armoricaine de Radiologie, France                             | 2 |
| Djelila Allouache         | Centre Francois Baclesse, Comite Sein, France                          | 2 |
| Elisabeth Luporsi         | Centre Alexis Vautrin, Recherche Clinique, France                      | 2 |
| Julien Grenier            | Clinique Sainte Catherine, Hôpital de Semaine, France                  | 2 |
| Alfredo Falcone           | Ospedale Santa Chiara, Italy                                           | 2 |
| Rodrigo Pereira           | Irmandade Santa Casa de Misericórdia de Porto Alegre, Brazil           | 2 |
| Vera Lucia Silva Teixeira | Oncoclinica, Brazil                                                    | 2 |
| Kazimierz Drosik          | Opolskie Centrum Onkologii, Oddzial Onkologii Klinicznej, Poland       | 2 |
| Marek Wojtukiewicz        | Bialostockie Centrum Onkologii, Oddzial Onkologii Klinicznej, Poland   | 2 |
| Elmar Stickeler           | Uniklinik Freiburg, Frauenklinik, Germany                              | 2 |
| Eva Ciruelos Gil          | University Hospital 12 de Octubre, Spain                               | 2 |
| Dah-Cherng Yeh            | Taichung Veterans General Hospital, Taiwan                             | 2 |
| Ralph Winterhalder        | Luzerner Kantonsspital, Switzerland                                    | 2 |
| Carlos Alberto Hernandez  | Oaxaca Site Management Organization, Mexico                            | 2 |

|                   |                                                                            |   |
|-------------------|----------------------------------------------------------------------------|---|
| Zdenka Gojkovic   | Clinical Center Banja Luka, Bosnia and Herzegovina                         | 2 |
| Paul Francis Pua  | Veterans Memorial Medical Centre, Philippines                              | 2 |
| Anca Bulgaru      | Eastern Connecticut Hematology, Norwich, Connecticut, USA                  | 1 |
| Andrzej Kudelka   | Stony Brook University Cancer Center, Stony Brook, New York, USA           | 1 |
| Ashwin Kashyap    | Tri-Valley Oncology-Hematology Association, Thousand Oaks, California, USA | 1 |
| Barbara Bower     | Southdale Cancer Clinic, Edina, Minnesota, USA                             | 1 |
| Beth Hellerstedt  | Texas Oncology-Austin Central, Austin, Texas, USA                          | 1 |
| David Chan        | Cancer Center Oncology Medical Group, La Mesa, California, USA             | 1 |
| Diana Medgyesy    | Front Range Cancer Specialist, Fort Collins, Colorado, USA                 | 1 |
| Haluk Tezcan      | Kootenai Cancer Center, Post Falls, Indiana                                | 1 |
| Haythem Ali       | Henry Ford Hospital, Detroit, Michigan, USA                                | 1 |
| James Neidhart    | San Juan Oncology, Farmington, New Mexico, USA                             | 1 |
| James Wade        | Cancer Care Specialists of Illinois, Swansea, Illinois, USA                | 1 |
| John M. Wallmark  | Associates in Oncology and Hematology, Bethesda, Maryland, USA             | 1 |
| Jonathan Eneman   | York Hospital, York, Maine, USA                                            | 1 |
| Joseph Leach      | Park Nicollet Institute, St. Louis Park, Minnesota, USA                    | 1 |
| K. M. Steve Lo    | Hematology Oncology PC, Stamford, Connecticut, USA                         | 1 |
| Mary Wilkinson    | Medical Oncology & Hematology, Fairfax, Virginia, USA                      | 1 |
| Mehdi Moezi       | Integrated Community Oncology Network, Jacksonville, Florida, USA          | 1 |
| Neal Christiansen | Medical University of South Carolina, Charleston, South Carolina, USA      | 1 |
| Nicholas Iannotti | Hematology Oncology Associates of the Treasure Coast, Stuart, Florida, USA | 1 |
| Paulette Blanchet | Cancer Center of Acadiana at Lafayette, Lafayette, Louisiana, USA          | 1 |
| Ralph Boccia      | Center for Cancer and Blood Disorders, Bethesda, Maryland, USA             | 1 |
| Sudhathi Chennuru | Hematology Oncology Consultants, Westerville, Ohio                         | 1 |
| Sujatha Murali    | Emory University, Druid Hills, Georgia, USA                                | 1 |
| William Conkright | Purchase Cancer Group, Paducah, Kentucky, USA                              | 1 |
| Andrew Robinson   | Sudbury General Hospital, Canada                                           | 1 |
| Amit Chakrabarti  | Poole General Hospital, France                                             | 1 |
| Bruno Coudert     | Centre Georges Francois Leclerc, France                                    | 1 |



|                      |                                                                               |   |
|----------------------|-------------------------------------------------------------------------------|---|
| Eliot Sims           | Queens Hospital-Romford Cardio Research                                       | 1 |
| Jill Bishop          | North Wales Cancer Treatment Centre, Glan Clwyd Hospital, United Kingdom      | 1 |
| Armando Santoro      | Istituto Clinico Humanitas, Italy                                             | 1 |
| Claudia Bighin       | Istituto Nazionale per la Ricerca sul Cancro, Italy                           | 1 |
| Filippo Montemurro   | Istituto di Candiolo, Fondazione del Piemonte per L'Oncologia, Italy          | 1 |
| Gilberto Amorim      | Oncologistas Associados, Italy                                                | 1 |
| Giulia Bianchi       | Istituto Nazionale per lo Studio e la Cura dei Tumori, Italy                  | 1 |
| Lucia Del Mastro     | Istituto Nazionale per la Ricerca sul Cancro, Italy                           | 1 |
| Marco Venturini      | Ospedale Sacro Cuore don Calabria, Italy                                      | 1 |
| Marcos Portella      | Biocancer, Brazil                                                             | 1 |
| Oliver Tome          | St. Vincentius-Kliniken Klinik für Frauenheilkunde Hebammenlehre, Germany     | 1 |
| Volker Hagen         | St. Johannes Hospital, Germany                                                | 1 |
| Yon Dschin Ko        | Betriebsstaette Johanniter-Krankenhaus, Germany                               | 1 |
| Jose Baselga         | University Hospital Vall d'Hebron, Spain                                      | 1 |
| Miguel Climent Duran | Istituto Valenciano de Oncologia, Spain                                       | 1 |
| Johan Ahlgren        | Gävle Sjukhus Onkologkliniken, Sweden                                         | 1 |
| Olga Zharkova        | State Institution of Healthcare Regional Clinical Oncology Dispensary, Russia | 1 |
| Maria Isabel Pazos   | IPO de Coimbra, Portugal                                                      | 1 |
| Rikka Huovinen       | Turku University Hospital, Finland                                            | 1 |
| Soren Cold           | Odense University Hospital, Denmark                                           | 1 |
| Vinod Raina          | Institute Rotary Cancer Hospital, AIIMS, India                                | 1 |
| Richard Isaacs       | Palmerston North Hospital, Regional Cancer Treatment Service, New Zealand     | 1 |

**Table S2: Summary of safety events**

|                             | <b>Capecitabine plus lapatinib (n=488)</b> |                |                |                | <b>Trastuzumab emtansine (n=490)</b> |                |                |                |
|-----------------------------|--------------------------------------------|----------------|----------------|----------------|--------------------------------------|----------------|----------------|----------------|
| <b>n (%)</b>                | <b>Grade 1-2</b>                           | <b>Grade 3</b> | <b>Grade 4</b> | <b>Grade 5</b> | <b>Grade 1-2</b>                     | <b>Grade 3</b> | <b>Grade 4</b> | <b>Grade 5</b> |
| <b>Diarrhoea</b>            | 286 (58.6%)                                | 100 (20.5%)    | 3 (0.6%)       | 0 (0%)         | 115 (23.5%)                          | 9 (1.8%)       | 0 (0%)         | 0 (0%)         |
| <b>Nausea</b>               | 212 (43.4%)                                | 12 (2.5%)      | 1 (0.2%)       | 0 (0%)         | 198 (40.4%)                          | 4 (0.8%)       | 0 (0%)         | 0 (0%)         |
| <b>PPE syndrome</b>         | 204 (41.8%)                                | 86 (17.6%)     | 1 (0.2%)       | 0 (0%)         | 7 (1.4%)                             | 0 (0%)         | 0 (0%)         | 0 (0%)         |
| <b>Fatigue</b>              | 128 (26.2%)                                | 16 (3.3%)      | 1 (0.2%)       | 0 (0%)         | 169 (34.5%)                          | 11 (2.2%)      | 1 (0.2%)       | 0 (0%)         |
| <b>Rash</b>                 | 127 (26.0%)                                | 7 (1.4%)       | 1 (0.2%)       | 0 (0%)         | 64 (13.1%)                           | 0 (0%)         | 0 (0%)         | 0 (0%)         |
| <b>Vomiting</b>             | 126 (25.8%)                                | 23 (4.7%)      | 1 (0.2%)       | 0 (0%)         | 97 (19.8%)                           | 5 (1.0%)       | 0 (0%)         | 0 (0%)         |
| <b>Decreased appetite</b>   | 112 (23.0%)                                | 5 (1.0%)       | 0 (0%)         | 0 (0%)         | 103 (21.0%)                          | 2 (0.4%)       | 0 (0%)         | 0 (0%)         |
| <b>Mucosal inflammation</b> | 82 (16.8%)                                 | 9 (1.8%)       | 2 (0.4%)       | 0 (0%)         | 32 (6.5%)                            | 1 (0.2%)       | 0 (0%)         | 0 (0%)         |
| <b>Asthenia</b>             | 79 (16.2%)                                 | 8 (1.6%)       | 1 (0.2%)       | 0 (0%)         | 88 (18.0%)                           | 4 (0.8%)       | 0 (0%)         | 0 (0%)         |
| <b>Headache</b>             | 73 (15.0%)                                 | 4 (0.8%)       | 0 (0%)         | 0 (0%)         | 143 (29.2%)                          | 4 (0.8%)       | 0 (0%)         | 0 (0%)         |
| <b>Stomatitis</b>           | 69 (14.1%)                                 | 2 (0.4%)       | 0 (0%)         | 0 (0%)         | 20 (4.1%)                            | 0 (0%)         | 0 (0%)         | 0 (0%)         |
| <b>Cough</b>                | 67 (13.7%)                                 | 1 (0.2%)       | 0 (0%)         | 0 (0%)         | 99 (20.2%)                           | 1 (0.2%)       | 0 (0%)         | 0 (0%)         |
| <b>Back pain</b>            | 61 (12.5%)                                 | 2 (0.4%)       | 0 (0%)         | 0 (0%)         | 75 (15.3%)                           | 4 (0.8%)       | 0 (0%)         | 0 (0%)         |
| <b>Constipation</b>         | 60 (12.3%)                                 | 0 (0%)         | 0 (0%)         | 0 (0%)         | 137 (28.0%)                          | 2 (0.4%)       | 0 (0%)         | 0 (0%)         |

|                                          |            |          |        |        |             |           |        |        |
|------------------------------------------|------------|----------|--------|--------|-------------|-----------|--------|--------|
| <b>Pain in extremity</b>                 | 57 (11.7%) | 5 (1.0%) | 0 (0%) | 0 (0%) | 69 (14.1%)  | 2 (0.4%)  | 0 (0%) | 0 (0%) |
| <b>Dyspepsia</b>                         | 55 (11.3%) | 2 (0.4%) | 0 (0%) | 0 (0%) | 51 (10.4%)  | 0 (0%)    | 0 (0%) | 0 (0%) |
| <b>Dry skin</b>                          | 54 (11.1%) | 1 (0.2%) | 0 (0%) | 0 (0%) | 17 (3.5%)   | 0 (0%)    | 0 (0%) | 0 (0%) |
| <b>Paronychia</b>                        | 53 (10.9%) | 6 (1.2%) | 0 (0%) | 0 (0%) | 2 (0.4%)    | 0 (0%)    | 0 (0%) | 0 (0%) |
| <b>Dizziness</b>                         | 52 (10.7%) | 1 (0.2%) | 0 (0%) | 0 (0%) | 61 (12.4%)  | 2 (0.4%)  | 0 (0%) | 0 (0%) |
| <b>Arthralgia</b>                        | 47 (9.6%)  | 0 (0%)   | 0 (0%) | 0 (0%) | 99 (20.2%)  | 3 (0.6%)  | 0 (0%) | 0 (0%) |
| <b>Pruritus</b>                          | 47 (9.6%)  | 0 (0%)   | 0 (0%) | 0 (0%) | 31 (6.3%)   | 1 (0.2%)  | 0 (0%) | 0 (0%) |
| <b>Increased AST</b>                     | 46 (9.4%)  | 7 (1.4%) | 0 (0%) | 0 (0%) | 101 (20.6%) | 22 (4.5%) | 0 (0%) | 0 (0%) |
| <b>Abdominal pain</b>                    | 45 (9.2%)  | 7 (1.4%) | 0 (0%) | 0 (0%) | 43 (8.8%)   | 3 (0.6%)  | 0 (0%) | 0 (0%) |
| <b>Insomnia</b>                          | 45 (9.2%)  | 1 (0.2%) | 0 (0%) | 0 (0%) | 67 (13.7%)  | 3 (0.6%)  | 0 (0%) | 0 (0%) |
| <b>Nail disorder</b>                     | 45 (9.2%)  | 3 (0.6%) | 0 (0%) | 0 (0%) | 18 (3.7%)   | 0 (0%)    | 0 (0%) | 0 (0%) |
| <b>Epistaxis</b>                         | 44 (9.0%)  | 0 (0%)   | 0 (0%) | 0 (0%) | 120 (24.5%) | 2 (0.4%)  | 0 (0%) | 0 (0%) |
| <b>Upper abdominal pain</b>              | 44 (9.0%)  | 1 (0.2%) | 0 (0%) | 0 (0%) | 58 (11.8%)  | 2 (0.4%)  | 0 (0%) | 0 (0%) |
| <b>Pyrexia</b>                           | 43 (8.8%)  | 2 (0.4%) | 0 (0%) | 0 (0%) | 99 (20.2%)  | 1 (0.2%)  | 0 (0%) | 0 (0%) |
| <b>Hyperbilirubinaemia</b>               | 41 (8.4%)  | 6 (1.2%) | 0 (0%) | 0 (0%) | 11 (2.2%)   | 2 (0.4%)  | 0 (0%) | 0 (0%) |
| <b>Nasopharyngitis</b>                   | 41 (8.4%)  | 0 (0%)   | 0 (0%) | 0 (0%) | 49 (10.0%)  | 0 (0%)    | 0 (0%) | 0 (0%) |
| <b>Upper respiratory tract infection</b> | 40 (8.2%)  | 0 (0%)   | 0 (0%) | 0 (0%) | 57 (11.6%)  | 0 (0%)    | 0 (0%) | 0 (0%) |

|                                      |           |           |          |        |            |           |          |        |
|--------------------------------------|-----------|-----------|----------|--------|------------|-----------|----------|--------|
| <b>Dyspnoea</b>                      | 39 (8.0%) | 1 (0.2%)  | 1 (0.2%) | 0 (0%) | 59 (12.0%) | 4 (0.8%)  | 0 (0%)   | 0 (0%) |
| <b>Increased ALT</b>                 | 39 (8.0%) | 9 (1.8%)  | 0 (0%)   | 0 (0%) | 78 (15.9%) | 15 (3.1%) | 0 (0%)   | 0 (0%) |
| <b>Peripheral oedema</b>             | 37 (7.6%) | 1 (0.2%)  | 0 (0%)   | 0 (0%) | 38 (7.8%)  | 0 (0%)    | 0 (0%)   | 0 (0%) |
| <b>Decreased weight</b>              | 35 (7.2%) | 2 (0.4%)  | 0 (0%)   | 0 (0%) | 36 (7.3%)  | 2 (0.4%)  | 0 (0%)   | 0 (0%) |
| <b>Anaemia</b>                       | 30 (6.1%) | 11 (2.3%) | 0 (0%)   | 0 (0%) | 49 (10.0%) | 18 (3.7%) | 1 (0.2%) | 0 (0%) |
| <b>Peripheral neuropathy</b>         | 29 (5.9%) | 1 (0.2%)  | 0 (0%)   | 0 (0%) | 50 (10.2%) | 9 (1.8%)  | 0 (0%)   | 0 (0%) |
| <b>Depression</b>                    | 28 (5.7%) | 1 (0.2%)  | 1 (0.2%) | 0 (0%) | 25 (5.1%)  | 1 (0.2%)  | 1 (0.2%) | 0 (0%) |
| <b>Increased blood bilirubin</b>     | 28 (5.7%) | 4 (0.8%)  | 0 (0%)   | 0 (0%) | 18 (3.7%)  | 2 (0.4%)  | 0 (0%)   | 0 (0%) |
| <b>Peripheral sensory neuropathy</b> | 27 (5.5%) | 0 (0%)    | 0 (0%)   | 0 (0%) | 30 (6.1%)  | 6 (1.2%)  | 0 (0%)   | 0 (0%) |
| <b>Chest pain</b>                    | 26 (5.3%) | 1 (0.2%)  | 0 (0%)   | 0 (0%) | 39 (8.0%)  | 2 (0.4%)  | 0 (0%)   | 0 (0%) |
| <b>Dry mouth</b>                     | 25 (5.1%) | 1 (0.2%)  | 0 (0%)   | 0 (0%) | 85 (17.3%) | 0 (0%)    | 0 (0%)   | 0 (0%) |
| <b>Erythema</b>                      | 24 (4.9%) | 1 (0.2%)  | 0 (0%)   | 0 (0%) | 15 (3.1%)  | 1 (0.2%)  | 0 (0%)   | 0 (0%) |
| <b>Skin fissures</b>                 | 24 (4.9%) | 3 (0.6%)  | 0 (0%)   | 0 (0%) | 2 (0.4%)   | 0 (0%)    | 0 (0%)   | 0 (0%) |
| <b>Hypokalaemia</b>                  | 23 (4.7%) | 21 (4.3%) | 1 (0.2%) | 0 (0%) | 37 (7.6%)  | 11 (2.2%) | 0 (0%)   | 0 (0%) |
| <b>Neutropenia</b>                   | 23 (4.7%) | 16 (3.3%) | 5 (1.0%) | 0 (0%) | 26 (5.3%)  | 9 (1.8%)  | 2 (0.4%) | 0 (0%) |
| <b>Musculoskeletal chest pain</b>    | 21 (4.3%) | 2 (0.4%)  | 0 (0%)   | 0 (0%) | 18 (3.7%)  | 0 (0%)    | 1 (0.2%) | 0 (0%) |
| <b>Urinary tract infection</b>       | 21 (4.3%) | 0 (0%)    | 0 (0%)   | 0 (0%) | 50 (10.2%) | 3 (0.6%)  | 0 (0%)   | 0 (0%) |

|                                             |           |          |          |        |            |            |           |        |
|---------------------------------------------|-----------|----------|----------|--------|------------|------------|-----------|--------|
| <b>Dehydration</b>                          | 20 (4.1%) | 7 (1.4%) | 0 (0%)   | 0 (0%) | 9 (1.8%)   | 0 (0%)     | 0 (0%)    | 0 (0%) |
| <b>Dysgeusia</b>                            | 20 (4.1%) | 1 (0.2%) | 0 (0%)   | 0 (0%) | 41 (8.4%)  | 0 (0%)     | 0 (0%)    | 0 (0%) |
| <b>Increased blood alkaline phosphatase</b> | 20 (4.1%) | 3 (0.6%) | 0 (0%)   | 0 (0%) | 23 (4.7%)  | 3 (0.6%)   | 0 (0%)    | 0 (0%) |
| <b>Musculoskeletal pain</b>                 | 20 (4.1%) | 2 (0.4%) | 0 (0%)   | 0 (0%) | 45 (9.2%)  | 1 (0.2%)   | 0 (0%)    | 0 (0%) |
| <b>Myalgia</b>                              | 20 (4.1%) | 0 (0%)   | 0 (0%)   | 0 (0%) | 67 (13.7%) | 3 (0.6%)   | 0 (0%)    | 0 (0%) |
| <b>Bone pain</b>                            | 19 (3.9%) | 1 (0.2%) | 0 (0%)   | 0 (0%) | 33 (6.7%)  | 2 (0.4%)   | 0 (0%)    | 0 (0%) |
| <b>Dermatitis</b>                           | 16 (3.3%) | 4 (0.8%) | 0 (0%)   | 0 (0%) | 2 (0.4%)   | 0 (0%)     | 0 (0%)    | 0 (0%) |
| <b>Nail infection</b>                       | 14 (2.9%) | 0 (0%)   | 1 (0.2%) | 0 (0%) | 1 (0.2%)   | 0 (0%)     | 0 (0%)    | 0 (0%) |
| <b>Pain</b>                                 | 14 (2.9%) | 2 (0.4%) | 0 (0%)   | 0 (0%) | 30 (6.1%)  | 5 (1.0%)   | 0 (0%)    | 0 (0%) |
| <b>Leukopenia</b>                           | 13 (2.7%) | 3 (0.6%) | 1 (0.2%) | 0 (0%) | 19 (3.9%)  | 4 (0.8%)   | 1 (0.2%)  | 0 (0%) |
| <b>Thrombocytopaenia</b>                    | 12 (2.5%) | 0 (0%)   | 2 (0.4%) | 0 (0%) | 80 (16.3%) | 56 (11.4%) | 14 (2.9%) | 0 (0%) |
| <b>Decreased haemoglobin</b>                | 10 (2.0%) | 1 (0.2%) | 0 (0%)   | 0 (0%) | 10 (2.0%)  | 4 (0.8%)   | 1 (0.2%)  | 0 (0%) |
| <b>Hypoaesthesia</b>                        | 10 (2.0%) | 1 (0.2%) | 0 (0%)   | 0 (0%) | 15 (3.1%)  | 0 (0%)     | 0 (0%)    | 0 (0%) |
| <b>Muscular weakness</b>                    | 10 (2.0%) | 1 (0.2%) | 0 (0%)   | 0 (0%) | 8 (1.6%)   | 0 (0%)     | 1 (0.2%)  | 0 (0%) |
| <b>Decreased ejection fraction</b>          | 9 (1.8%)  | 2 (0.4%) | 0 (0%)   | 0 (0%) | 5 (1.0%)   | 0 (0%)     | 0 (0%)    | 0 (0%) |
| <b>Hypertension</b>                         | 9 (1.8%)  | 2 (0.4%) | 0 (0%)   | 0 (0%) | 22 (4.5%)  | 7 (1.4%)   | 0 (0%)    | 0 (0%) |
| <b>Skin exfoliation</b>                     | 9 (1.8%)  | 1 (0.2%) | 1 (0.2%) | 0 (0%) | 3 (0.6%)   | 0 (0%)     | 0 (0%)    | 0 (0%) |

|                                         |          |          |          |        |           |          |          |        |
|-----------------------------------------|----------|----------|----------|--------|-----------|----------|----------|--------|
| <b>Cellulitis</b>                       | 8 (1.6%) | 3 (0.6%) | 1 (0.2%) | 0 (0%) | 6 (1.2%)  | 3 (0.6%) | 0 (0%)   | 0 (0%) |
| <b>Decreased neutrophil count</b>       | 8 (1.6%) | 1 (0.2%) | 0 (0%)   | 0 (0%) | 6 (1.2%)  | 0 (0%)   | 0 (0%)   | 0 (0%) |
| <b>Lethargy</b>                         | 8 (1.6%) | 0 (0%)   | 0 (0%)   | 0 (0%) | 14 (2.9%) | 2 (0.4%) | 0 (0%)   | 0 (0%) |
| <b>Lymphoedema</b>                      | 8 (1.6%) | 1 (0.2%) | 0 (0%)   | 0 (0%) | 4 (0.8%)  | 0 (0%)   | 0 (0%)   | 0 (0%) |
| <b>Vertigo</b>                          | 8 (1.6%) | 2 (0.4%) | 0 (0%)   | 0 (0%) | 9 (1.8%)  | 0 (0%)   | 0 (0%)   | 0 (0%) |
| <b>Neck pain</b>                        | 7 (1.4%) | 3 (0.6%) | 0 (0%)   | 0 (0%) | 21 (4.3%) | 1 (0.2%) | 0 (0%)   | 0 (0%) |
| <b>Oral herpes</b>                      | 7 (1.4%) | 1 (0.2%) | 0 (0%)   | 0 (0%) | 5 (1.0%)  | 0 (0%)   | 0 (0%)   | 0 (0%) |
| <b>Gastritis</b>                        | 6 (1.2%) | 0 (0%)   | 0 (0%)   | 0 (0%) | 6 (1.2%)  | 1 (0.2%) | 0 (0%)   | 0 (0%) |
| <b>Gastroenteritis</b>                  | 6 (1.2%) | 1 (0.2%) | 0 (0%)   | 0 (0%) | 4 (0.8%)  | 0 (0%)   | 0 (0%)   | 0 (0%) |
| <b>Hyperglycaemia</b>                   | 6 (1.2%) | 1 (0.2%) | 0 (0%)   | 0 (0%) | 8 (1.6%)  | 3 (0.6%) | 0 (0%)   | 0 (0%) |
| <b>Hyponatraemia</b>                    | 6 (1.2%) | 1 (0.2%) | 1 (0.2%) | 0 (0%) | 2 (0.4%)  | 1 (0.2%) | 3 (0.6%) | 0 (0%) |
| <b>Left ventricular dysfunction</b>     | 6 (1.2%) | 0 (0%)   | 0 (0%)   | 0 (0%) | 5 (1.0%)  | 1 (0.2%) | 0 (0%)   | 0 (0%) |
| <b>Tachycardia</b>                      | 6 (1.2%) | 0 (0%)   | 0 (0%)   | 0 (0%) | 7 (1.4%)  | 1 (0.2%) | 0 (0%)   | 0 (0%) |
| <b>Decreased white blood cell count</b> | 5 (1.0%) | 2 (0.4%) | 0 (0%)   | 0 (0%) | 4 (0.8%)  | 0 (0%)   | 0 (0%)   | 0 (0%) |
| <b>Herpes zoster</b>                    | 5 (1.0%) | 1 (0.2%) | 0 (0%)   | 0 (0%) | 9 (1.8%)  | 1 (0.2%) | 0 (0%)   | 0 (0%) |
| <b>Infection</b>                        | 5 (1.0%) | 1 (0.2%) | 0 (0%)   | 0 (0%) | 9 (1.8%)  | 0 (0%)   | 0 (0%)   | 0 (0%) |
| <b>Pleural effusion</b>                 | 5 (1.0%) | 0 (0%)   | 0 (0%)   | 0 (0%) | 3 (0.6%)  | 1 (0.2%) | 0 (0%)   | 0 (0%) |

|                                     |          |          |          |        |           |          |          |          |
|-------------------------------------|----------|----------|----------|--------|-----------|----------|----------|----------|
| <b>Pneumonia</b>                    | 5 (1.0%) | 1 (0.2%) | 0 (0%)   | 0 (0%) | 9 (1.8%)  | 3 (0.6%) | 1 (0.2%) | 1 (0.2%) |
| <b>Pulmonary embolism</b>           | 5 (1.0%) | 3 (0.6%) | 6 (1.2%) | 0 (0%) | 1 (0.2%)  | 0 (0%)   | 0 (0%)   | 0 (0%)   |
| <b>Vaginal infection</b>            | 5 (1.0%) | 1 (0.2%) | 0 (0%)   | 0 (0%) | 7 (1.4%)  | 0 (0%)   | 0 (0%)   | 0 (0%)   |
| <b>Bronchitis</b>                   | 4 (0.8%) | 0 (0%)   | 0 (0%)   | 0 (0%) | 12 (2.4%) | 1 (0.2%) | 0 (0%)   | 0 (0%)   |
| <b>Confused state</b>               | 4 (0.8%) | 2 (0.4%) | 0 (0%)   | 0 (0%) | 8 (1.6%)  | 0 (0%)   | 1 (0.2%) | 0 (0%)   |
| <b>Dysphagia</b>                    | 4 (0.8%) | 1 (0.2%) | 0 (0%)   | 0 (0%) | 5 (1.0%)  | 0 (0%)   | 0 (0%)   | 0 (0%)   |
| <b>Erysipelas</b>                   | 4 (0.8%) | 1 (0.2%) | 0 (0%)   | 0 (0%) | 2 (0.4%)  | 1 (0.2%) | 0 (0%)   | 0 (0%)   |
| <b>Hypotension</b>                  | 4 (0.8%) | 0 (0%)   | 0 (0%)   | 0 (0%) | 5 (1.0%)  | 0 (0%)   | 1 (0.2%) | 0 (0%)   |
| <b>Increased transaminases</b>      | 4 (0.8%) | 1 (0.2%) | 0 (0%)   | 0 (0%) | 12 (2.4%) | 3 (0.6%) | 1 (0.2%) | 0 (0%)   |
| <b>Rectal haemorrhage</b>           | 4 (0.8%) | 1 (0.2%) | 0 (0%)   | 0 (0%) | 9 (1.8%)  | 0 (0%)   | 0 (0%)   | 0 (0%)   |
| <b>Abnormal liver function test</b> | 3 (0.6%) | 0 (0%)   | 0 (0%)   | 0 (0%) | 3 (0.6%)  | 1 (0.2%) | 0 (0%)   | 0 (0%)   |
| <b>Ataxia</b>                       | 3 (0.6%) | 0 (0%)   | 0 (0%)   | 0 (0%) | 1 (0.2%)  | 1 (0.2%) | 0 (0%)   | 0 (0%)   |
| <b>Cataract</b>                     | 3 (0.6%) | 0 (0%)   | 0 (0%)   | 0 (0%) | 0 (0%)    | 1 (0.2%) | 0 (0%)   | 0 (0%)   |
| <b>Decreased platelet count</b>     | 3 (0.6%) | 0 (0%)   | 0 (0%)   | 0 (0%) | 10 (2.0%) | 4 (0.8%) | 1 (0.2%) | 0 (0%)   |
| <b>Hypoalbuminaemia</b>             | 3 (0.6%) | 1 (0.2%) | 0 (0%)   | 0 (0%) | 4 (0.8%)  | 0 (0%)   | 0 (0%)   | 0 (0%)   |
| <b>Hypophosphataemia</b>            | 3 (0.6%) | 1 (0.2%) | 0 (0%)   | 0 (0%) | 3 (0.6%)  | 1 (0.2%) | 0 (0%)   | 0 (0%)   |
| <b>Jaundice</b>                     | 3 (0.6%) | 1 (0.2%) | 0 (0%)   | 0 (0%) | 0 (0%)    | 0 (0%)   | 0 (0%)   | 0 (0%)   |

|                                    |          |          |          |        |          |          |        |        |
|------------------------------------|----------|----------|----------|--------|----------|----------|--------|--------|
| <b>Lymphopenia</b>                 | 3 (0-6%) | 2 (0-4%) | 0 (0%)   | 0 (0%) | 3 (0-6%) | 1 (0-2%) | 0 (0%) | 0 (0%) |
| <b>Menorrhagia</b>                 | 3 (0-6%) | 1 (0-2%) | 0 (0%)   | 0 (0%) | 2 (0-4%) | 1 (0-2%) | 0 (0%) | 0 (0%) |
| <b>Oesophagitis</b>                | 3 (0-6%) | 1 (0-2%) | 0 (0%)   | 0 (0%) | 2 (0-4%) | 0 (0%)   | 0 (0%) | 0 (0%) |
| <b>Proctalgia</b>                  | 3 (0-6%) | 1 (0-2%) | 0 (0%)   | 0 (0%) | 0 (0%)   | 0 (0%)   | 0 (0%) | 0 (0%) |
| <b>Tremor</b>                      | 3 (0-6%) | 0 (0%)   | 0 (0%)   | 0 (0%) | 5 (1-0%) | 1 (0-2%) | 0 (0%) | 0 (0%) |
| <b>Decreased blood calcium</b>     | 2 (0-4%) | 1 (0-2%) | 0 (0%)   | 0 (0%) | 1 (0-2%) | 0 (0%)   | 0 (0%) | 0 (0%) |
| <b>Deep vein thrombosis</b>        | 2 (0-4%) | 2 (0-4%) | 1 (0-2%) | 0 (0%) | 0 (0%)   | 0 (0%)   | 0 (0%) | 0 (0%) |
| <b>Generalised pruritus</b>        | 2 (0-4%) | 0 (0%)   | 0 (0%)   | 0 (0%) | 3 (0-6%) | 1 (0-2%) | 0 (0%) | 0 (0%) |
| <b>Haemorrhage</b>                 | 2 (0-4%) | 0 (0%)   | 0 (0%)   | 0 (0%) | 1 (0-2%) | 1 (0-2%) | 0 (0%) | 0 (0%) |
| <b>Hepatocellular injury</b>       | 2 (0-4%) | 1 (0-2%) | 0 (0%)   | 0 (0%) | 3 (0-6%) | 0 (0%)   | 0 (0%) | 0 (0%) |
| <b>Malaise</b>                     | 2 (0-4%) | 0 (0%)   | 0 (0%)   | 0 (0%) | 3 (0-6%) | 2 (0-4%) | 0 (0%) | 0 (0%) |
| <b>Metrorrhagia</b>                | 2 (0-4%) | 0 (0%)   | 0 (0%)   | 0 (0%) | 3 (0-6%) | 2 (0-4%) | 0 (0%) | 0 (0%) |
| <b>Pericardial effusion</b>        | 2 (0-4%) | 0 (0%)   | 1 (0-2%) | 0 (0%) | 3 (0-6%) | 0 (0%)   | 0 (0%) | 0 (0%) |
| <b>Peripheral motor neuropathy</b> | 2 (0-4%) | 0 (0%)   | 0 (0%)   | 0 (0%) | 3 (0-6%) | 2 (0-4%) | 0 (0%) | 0 (0%) |
| <b>Pleuritic pain</b>              | 2 (0-4%) | 1 (0-2%) | 0 (0%)   | 0 (0%) | 0 (0%)   | 0 (0%)   | 0 (0%) | 0 (0%) |
| <b>Procedural pain</b>             | 2 (0-4%) | 0 (0%)   | 0 (0%)   | 0 (0%) | 4 (0-8%) | 1 (0-2%) | 0 (0%) | 0 (0%) |
| <b>Skin toxicity</b>               | 2 (0-4%) | 1 (0-2%) | 0 (0%)   | 0 (0%) | 0 (0%)   | 0 (0%)   | 0 (0%) | 0 (0%) |



|                                    |          |          |          |        |           |          |        |        |
|------------------------------------|----------|----------|----------|--------|-----------|----------|--------|--------|
| <b>Syncope</b>                     | 2 (0-4%) | 4 (0-8%) | 0 (0%)   | 0 (0%) | 1 (0-2%)  | 1 (0-2%) | 0 (0%) | 0 (0%) |
| <b>Tooth abscess</b>               | 2 (0-4%) | 0 (0%)   | 0 (0%)   | 0 (0%) | 0 (0%)    | 1 (0-2%) | 0 (0%) | 0 (0%) |
| <b>Urticaria</b>                   | 2 (0-4%) | 5 (1-0%) | 0 (0%)   | 0 (0%) | 5 (1-0%)  | 0 (0%)   | 0 (0%) | 0 (0%) |
| <b><i>C. difficile</i> colitis</b> | 1 (0-2%) | 1 (0-2%) | 0 (0%)   | 0 (0%) | 0 (0%)    | 1 (0-2%) | 0 (0%) | 0 (0%) |
| <b>Colitis</b>                     | 1 (0-2%) | 0 (0%)   | 0 (0%)   | 0 (0%) | 1 (0-2%)  | 1 (0-2%) | 0 (0%) | 0 (0%) |
| <b>Contact dermatitis</b>          | 1 (0-2%) | 0 (0%)   | 0 (0%)   | 0 (0%) | 5 (1-0%)  | 1 (0-2%) | 0 (0%) | 0 (0%) |
| <b>Decreased blood phosphorus</b>  | 1 (0-2%) | 1 (0-2%) | 0 (0%)   | 0 (0%) | 1 (0-2%)  | 0 (0%)   | 0 (0%) | 0 (0%) |
| <b>Decreased blood potassium</b>   | 1 (0-2%) | 3 (0-6%) | 0 (0%)   | 0 (0%) | 5 (1-0%)  | 2 (0-4%) | 0 (0%) | 0 (0%) |
| <b>Decreased lymphocyte count</b>  | 1 (0-2%) | 1 (0-2%) | 0 (0%)   | 0 (0%) | 1 (0-2%)  | 0 (0%)   | 0 (0%) | 0 (0%) |
| <b>Device-related infection</b>    | 1 (0-2%) | 0 (0%)   | 1 (0-2%) | 0 (0%) | 4 (0-8%)  | 0 (0%)   | 0 (0%) | 0 (0%) |
| <b>Epilepsy</b>                    | 1 (0-2%) | 0 (0%)   | 0 (0%)   | 0 (0%) | 0 (0%)    | 1 (0-2%) | 0 (0%) | 0 (0%) |
| <b>Exfoliative rash</b>            | 1 (0-2%) | 1 (0-2%) | 0 (0%)   | 0 (0%) | 3 (0-6%)  | 0 (0%)   | 0 (0%) | 0 (0%) |
| <b>Fall</b>                        | 1 (0-2%) | 1 (0-2%) | 0 (0%)   | 0 (0%) | 11 (2-2%) | 0 (0%)   | 0 (0%) | 0 (0%) |
| <b>Femur fracture</b>              | 1 (0-2%) | 2 (0-4%) | 0 (0%)   | 0 (0%) | 1 (0-2%)  | 2 (0-4%) | 0 (0%) | 0 (0%) |
| <b>Food poisoning</b>              | 1 (0-2%) | 1 (0-2%) | 0 (0%)   | 0 (0%) | 3 (0-6%)  | 0 (0%)   | 0 (0%) | 0 (0%) |
| <b>Gastrointestinal pain</b>       | 1 (0-2%) | 2 (0-4%) | 0 (0%)   | 0 (0%) | 1 (0-2%)  | 0 (0%)   | 0 (0%) | 0 (0%) |
| <b>Hypercalcaemia</b>              | 1 (0-2%) | 0 (0%)   | 1 (0-2%) | 0 (0%) | 5 (1-0%)  | 0 (0%)   | 0 (0%) | 0 (0%) |

|                                                 |          |          |          |          |          |          |          |          |
|-------------------------------------------------|----------|----------|----------|----------|----------|----------|----------|----------|
| <b>Ileus</b>                                    | 1 (0-2%) | 1 (0-2%) | 0 (0%)   | 0 (0%)   | 0 (0%)   | 0 (0%)   | 0 (0%)   | 0 (0%)   |
| <b>Increased hepatic enzymes</b>                | 1 (0-2%) | 0 (0%)   | 0 (0%)   | 0 (0%)   | 1 (0-2%) | 1 (0-2%) | 0 (0%)   | 0 (0%)   |
| <b>Increased international normalised ratio</b> | 1 (0-2%) | 2 (0-4%) | 0 (0%)   | 0 (0%)   | 1 (0-2%) | 1 (0-2%) | 0 (0%)   | 0 (0%)   |
| <b>Neuralgia</b>                                | 1 (0-2%) | 0 (0%)   | 0 (0%)   | 0 (0%)   | 3 (0-6%) | 1 (0-2%) | 0 (0%)   | 0 (0%)   |
| <b>Neurotoxicity</b>                            | 1 (0-2%) | 1 (0-2%) | 0 (0%)   | 0 (0%)   | 6 (1-2%) | 0 (0%)   | 0 (0%)   | 0 (0%)   |
| <b>Pain of skin</b>                             | 1 (0-2%) | 0 (0%)   | 0 (0%)   | 0 (0%)   | 1 (0-2%) | 1 (0-2%) | 0 (0%)   | 0 (0%)   |
| <b>Plantar erythema</b>                         | 1 (0-2%) | 1 (0-2%) | 0 (0%)   | 0 (0%)   | 0 (0%)   | 0 (0%)   | 0 (0%)   | 0 (0%)   |
| <b>Proctitis</b>                                | 1 (0-2%) | 1 (0-2%) | 0 (0%)   | 0 (0%)   | 1 (0-2%) | 0 (0%)   | 0 (0%)   | 0 (0%)   |
| <b>Renal failure</b>                            | 1 (0-2%) | 1 (0-2%) | 0 (0%)   | 0 (0%)   | 2 (0-4%) | 1 (0-2%) | 0 (0%)   | 0 (0%)   |
| <b>Upper respiratory tract viral infection</b>  | 1 (0-2%) | 0 (0%)   | 0 (0%)   | 0 (0%)   | 2 (0-4%) | 1 (0-2%) | 0 (0%)   | 0 (0%)   |
| <b>Venous thrombosis</b>                        | 1 (0-2%) | 1 (0-2%) | 0 (0%)   | 0 (0%)   | 0 (0%)   | 0 (0%)   | 0 (0%)   | 0 (0%)   |
| <b>Abnormal AST</b>                             | 0 (0%)   | 0 (0%)   | 0 (0%)   | 0 (0%)   | 0 (0%)   | 1 (0-2%) | 0 (0%)   | 0 (0%)   |
| <b>Abnormal hepatic function</b>                | 0 (0%)   | 1 (0-2%) | 0 (0%)   | 0 (0%)   | 0 (0%)   | 0 (0%)   | 0 (0%)   | 0 (0%)   |
| <b>Acute haemorrhagic conjunctivitis</b>        | 0 (0%)   | 1 (0-2%) | 0 (0%)   | 0 (0%)   | 0 (0%)   | 0 (0%)   | 0 (0%)   | 0 (0%)   |
| <b>Acute myeloid leukaemia</b>                  | 0 (0%)   | 0 (0%)   | 0 (0%)   | 0 (0%)   | 0 (0%)   | 0 (0%)   | 0 (0%)   | 1 (0-2%) |
| <b>Acute respiratory distress syndrome</b>      | 0 (0%)   | 0 (0%)   | 1 (0-2%) | 1 (0-2%) | 0 (0%)   | 0 (0%)   | 1 (0-2%) | 0 (0%)   |
| <b>Affect liability</b>                         | 0 (0%)   | 0 (0%)   | 0 (0%)   | 0 (0%)   | 1 (0-2%) | 1 (0-2%) | 0 (0%)   | 0 (0%)   |

|                                     |        |          |          |          |          |          |          |        |
|-------------------------------------|--------|----------|----------|----------|----------|----------|----------|--------|
| <b>Agitation</b>                    | 0 (0%) | 2 (0-4%) | 0 (0%)   | 0 (0%)   | 0 (0%)   | 0 (0%)   | 0 (0%)   | 0 (0%) |
| <b>Anaemia of malignant disease</b> | 0 (0%) | 0 (0%)   | 1 (0-2%) | 0 (0%)   | 0 (0%)   | 0 (0%)   | 0 (0%)   | 0 (0%) |
| <b>Angina pectoris</b>              | 0 (0%) | 1 (0-2%) | 0 (0%)   | 0 (0%)   | 0 (0%)   | 0 (0%)   | 0 (0%)   | 0 (0%) |
| <b>Appendicitis</b>                 | 0 (0%) | 0 (0%)   | 0 (0%)   | 0 (0%)   | 0 (0%)   | 1 (0-2%) | 0 (0%)   | 0 (0%) |
| <b>Areflexia</b>                    | 0 (0%) | 0 (0%)   | 0 (0%)   | 0 (0%)   | 0 (0%)   | 1 (0-2%) | 0 (0%)   | 0 (0%) |
| <b>Atrial fibrillation</b>          | 0 (0%) | 0 (0%)   | 0 (0%)   | 0 (0%)   | 1 (0-2%) | 1 (0-2%) | 0 (0%)   | 0 (0%) |
| <b>Bacteraemia</b>                  | 0 (0%) | 1 (0-2%) | 1 (0-2%) | 0 (0%)   | 1 (0-2%) | 0 (0%)   | 0 (0%)   | 0 (0%) |
| <b>Bacterial pneumonia</b>          | 0 (0%) | 0 (0%)   | 0 (0%)   | 0 (0%)   | 0 (0%)   | 1 (0-2%) | 0 (0%)   | 0 (0%) |
| <b>Cartilage injury</b>             | 0 (0%) | 0 (0%)   | 0 (0%)   | 0 (0%)   | 0 (0%)   | 1 (0-2%) | 0 (0%)   | 0 (0%) |
| <b>Catheter site infection</b>      | 0 (0%) | 0 (0%)   | 0 (0%)   | 0 (0%)   | 0 (0%)   | 0 (0%)   | 1 (0-2%) | 0 (0%) |
| <b>Cerebral ischaemia</b>           | 0 (0%) | 0 (0%)   | 0 (0%)   | 0 (0%)   | 0 (0%)   | 1 (0-2%) | 1 (0-2%) | 0 (0%) |
| <b>Cerebrovascular accident</b>     | 0 (0%) | 0 (0%)   | 1 (0-2%) | 0 (0%)   | 0 (0%)   | 1 (0-2%) | 0 (0%)   | 0 (0%) |
| <b>Cholangitis</b>                  | 0 (0%) | 0 (0%)   | 0 (0%)   | 0 (0%)   | 0 (0%)   | 1 (0-2%) | 0 (0%)   | 0 (0%) |
| <b>Cholesteatoma</b>                | 0 (0%) | 0 (0%)   | 0 (0%)   | 0 (0%)   | 0 (0%)   | 1 (0-2%) | 0 (0%)   | 0 (0%) |
| <b>Coma</b>                         | 0 (0%) | 0 (0%)   | 0 (0%)   | 1 (0-2%) | 0 (0%)   | 0 (0%)   | 0 (0%)   | 0 (0%) |
| <b>Coronary artery disease</b>      | 0 (0%) | 0 (0%)   | 0 (0%)   | 1 (0-2%) | 0 (0%)   | 0 (0%)   | 0 (0%)   | 0 (0%) |
| <b>Costochondritis</b>              | 0 (0%) | 0 (0%)   | 0 (0%)   | 0 (0%)   | 0 (0%)   | 1 (0-2%) | 0 (0%)   | 0 (0%) |

|                                     |        |          |          |          |          |          |          |        |
|-------------------------------------|--------|----------|----------|----------|----------|----------|----------|--------|
| <b>Decreased blood sodium</b>       | 0 (0%) | 2 (0-4%) | 0 (0%)   | 0 (0%)   | 1 (0-2%) | 0 (0%)   | 0 (0%)   | 0 (0%) |
| <b>Decreased performance status</b> | 0 (0%) | 0 (0%)   | 0 (0%)   | 0 (0%)   | 1 (0-2%) | 0 (0%)   | 1 (0-2%) | 0 (0%) |
| <b>Failure to thrive</b>            | 0 (0%) | 0 (0%)   | 0 (0%)   | 0 (0%)   | 0 (0%)   | 1 (0-2%) | 0 (0%)   | 0 (0%) |
| <b>Febrile neutropenia</b>          | 0 (0%) | 2 (0-4%) | 3 (0-6%) | 0 (0%)   | 0 (0%)   | 0 (0%)   | 0 (0%)   | 0 (0%) |
| <b>Femoral neck fracture</b>        | 0 (0%) | 1 (0-2%) | 0 (0%)   | 0 (0%)   | 0 (0%)   | 0 (0%)   | 0 (0%)   | 0 (0%) |
| <b>Fibular fracture</b>             | 0 (0%) | 0 (0%)   | 0 (0%)   | 0 (0%)   | 1 (0-2%) | 0 (0%)   | 1 (0-2%) | 0 (0%) |
| <b>Gastric infection</b>            | 0 (0%) | 1 (0-2%) | 0 (0%)   | 0 (0%)   | 0 (0%)   | 0 (0%)   | 0 (0%)   | 0 (0%) |
| <b>Gastric ulcer</b>                | 0 (0%) | 0 (0%)   | 0 (0%)   | 0 (0%)   | 0 (0%)   | 0 (0%)   | 1 (0-2%) | 0 (0%) |
| <b>Gastrointestinal haemorrhage</b> | 0 (0%) | 0 (0%)   | 0 (0%)   | 0 (0%)   | 0 (0%)   | 1 (0-2%) | 1 (0-2%) | 0 (0%) |
| <b>Genital erosion</b>              | 0 (0%) | 1 (0-2%) | 0 (0%)   | 0 (0%)   | 0 (0%)   | 0 (0%)   | 0 (0%)   | 0 (0%) |
| <b>H1N1 influenza</b>               | 0 (0%) | 1 (0-2%) | 0 (0%)   | 0 (0%)   | 0 (0%)   | 0 (0%)   | 0 (0%)   | 0 (0%) |
| <b>Hemiplegia</b>                   | 0 (0%) | 0 (0%)   | 0 (0%)   | 0 (0%)   | 0 (0%)   | 1 (0-2%) | 0 (0%)   | 0 (0%) |
| <b>Hepatotoxicity</b>               | 0 (0%) | 0 (0%)   | 0 (0%)   | 0 (0%)   | 1 (0-2%) | 1 (0-2%) | 0 (0%)   | 0 (0%) |
| <b>Hip fracture</b>                 | 0 (0%) | 0 (0%)   | 0 (0%)   | 0 (0%)   | 0 (0%)   | 1 (0-2%) | 0 (0%)   | 0 (0%) |
| <b>Hydrocephalus</b>                | 0 (0%) | 1 (0-2%) | 0 (0%)   | 1 (0-2%) | 0 (0%)   | 0 (0%)   | 0 (0%)   | 0 (0%) |
| <b>Increased GGT</b>                | 0 (0%) | 0 (0%)   | 0 (0%)   | 0 (0%)   | 4 (0-8%) | 5 (1-0%) | 1 (0-2%) | 0 (0%) |
| <b>Increased lipase</b>             | 0 (0%) | 0 (0%)   | 0 (0%)   | 0 (0%)   | 0 (0%)   | 1 (0-2%) | 0 (0%)   | 0 (0%) |

|                                 |        |          |        |          |           |          |          |          |
|---------------------------------|--------|----------|--------|----------|-----------|----------|----------|----------|
| <b>Infected neoplasm</b>        | 0 (0%) | 1 (0-2%) | 0 (0%) | 0 (0%)   | 0 (0%)    | 0 (0%)   | 0 (0%)   | 0 (0%)   |
| <b>Intestinal haemorrhage</b>   | 0 (0%) | 0 (0%)   | 0 (0%) | 0 (0%)   | 0 (0%)    | 1 (0-2%) | 0 (0%)   | 0 (0%)   |
| <b>Intestinal obstruction</b>   | 0 (0%) | 1 (0-2%) | 0 (0%) | 0 (0%)   | 0 (0%)    | 0 (0%)   | 0 (0%)   | 0 (0%)   |
| <b>Intracardiac thrombosis</b>  | 0 (0%) | 1 (0-2%) | 0 (0%) | 0 (0%)   | 0 (0%)    | 0 (0%)   | 0 (0%)   | 0 (0%)   |
| <b>Labile blood pressure</b>    | 0 (0%) | 0 (0%)   | 0 (0%) | 0 (0%)   | 0 (0%)    | 1 (0-2%) | 0 (0%)   | 0 (0%)   |
| <b>Ligament rupture</b>         | 0 (0%) | 0 (0%)   | 0 (0%) | 0 (0%)   | 0 (0%)    | 1 (0-2%) | 0 (0%)   | 0 (0%)   |
| <b>Listeriosis</b>              | 0 (0%) | 0 (0%)   | 0 (0%) | 0 (0%)   | 0 (0%)    | 0 (0%)   | 1 (0-2%) | 0 (0%)   |
| <b>Metabolic encephalopathy</b> | 0 (0%) | 0 (0%)   | 0 (0%) | 0 (0%)   | 0 (0%)    | 0 (0%)   | 0 (0%)   | 1 (0-2%) |
| <b>Multi-organ failure</b>      | 0 (0%) | 0 (0%)   | 0 (0%) | 1 (0-2%) | 0 (0%)    | 0 (0%)   | 0 (0%)   | 0 (0%)   |
| <b>Neutropenic sepsis</b>       | 0 (0%) | 0 (0%)   | 0 (0%) | 0 (0%)   | 1 (0-2%)  | 0 (0%)   | 0 (0%)   | 1 (0-2%) |
| <b>Osteonecrosis of the jaw</b> | 0 (0%) | 0 (0%)   | 0 (0%) | 0 (0%)   | 4 (0-8%)  | 1 (0-2%) | 0 (0%)   | 0 (0%)   |
| <b>Parotitis</b>                | 0 (0%) | 0 (0%)   | 0 (0%) | 0 (0%)   | 0 (0%)    | 1 (0-2%) | 0 (0%)   | 0 (0%)   |
| <b>Pathological fracture</b>    | 0 (0%) | 1 (0-2%) | 0 (0%) | 0 (0%)   | 2 (0-4%)  | 1 (0-2%) | 0 (0%)   | 0 (0%)   |
| <b>Peptic ulcer haemorrhage</b> | 0 (0%) | 1 (0-2%) | 0 (0%) | 0 (0%)   | 0 (0%)    | 0 (0%)   | 0 (0%)   | 0 (0%)   |
| <b>Pericarditis</b>             | 0 (0%) | 0 (0%)   | 0 (0%) | 0 (0%)   | 0 (0%)    | 1 (0-2%) | 0 (0%)   | 0 (0%)   |
| <b>Petechiae</b>                | 0 (0%) | 0 (0%)   | 0 (0%) | 0 (0%)   | 11 (2-2%) | 1 (0-2%) | 0 (0%)   | 0 (0%)   |
| <b>Pharyngitis</b>              | 0 (0%) | 0 (0%)   | 0 (0%) | 0 (0%)   | 8 (1-6%)  | 1 (0-2%) | 0 (0%)   | 0 (0%)   |

|                                             |        |          |          |        |          |          |          |        |
|---------------------------------------------|--------|----------|----------|--------|----------|----------|----------|--------|
| <b>Photophobia</b>                          | 0 (0%) | 1 (0-2%) | 0 (0%)   | 0 (0%) | 2 (0-4%) | 0 (0%)   | 0 (0%)   | 0 (0%) |
| <b>Portal hypertension</b>                  | 0 (0%) | 0 (0%)   | 0 (0%)   | 0 (0%) | 2 (0-4%) | 1 (0-2%) | 0 (0%)   | 0 (0%) |
| <b>Postoperative anaemia</b>                | 0 (0%) | 0 (0%)   | 0 (0%)   | 0 (0%) | 0 (0%)   | 1 (0-2%) | 0 (0%)   | 0 (0%) |
| <b>Pregnancy</b>                            | 0 (0%) | 0 (0%)   | 0 (0%)   | 0 (0%) | 0 (0%)   | 1 (0-2%) | 0 (0%)   | 0 (0%) |
| <b>Prolonged prothrombin time</b>           | 0 (0%) | 1 (0-2%) | 0 (0%)   | 0 (0%) | 0 (0%)   | 0 (0%)   | 0 (0%)   | 0 (0%) |
| <b>Pulmonary oedema</b>                     | 0 (0%) | 1 (0-2%) | 0 (0%)   | 0 (0%) | 0 (0%)   | 0 (0%)   | 0 (0%)   | 0 (0%) |
| <b>Renal cell carcinoma</b>                 | 0 (0%) | 0 (0%)   | 1 (0-2%) | 0 (0%) | 0 (0%)   | 0 (0%)   | 0 (0%)   | 0 (0%) |
| <b>Renal impairment</b>                     | 0 (0%) | 0 (0%)   | 0 (0%)   | 0 (0%) | 0 (0%)   | 1 (0-2%) | 0 (0%)   | 0 (0%) |
| <b>Respiratory failure</b>                  | 0 (0%) | 0 (0%)   | 1 (0-2%) | 0 (0%) | 0 (0%)   | 0 (0%)   | 0 (0%)   | 0 (0%) |
| <b>Sepsis</b>                               | 0 (0%) | 1 (0-2%) | 0 (0%)   | 0 (0%) | 1 (0-2%) | 1 (0-2%) | 0 (0%)   | 0 (0%) |
| <b>Spinal column stenosis</b>               | 0 (0%) | 0 (0%)   | 0 (0%)   | 0 (0%) | 0 (0%)   | 1 (0-2%) | 0 (0%)   | 0 (0%) |
| <b>Staphylococcal infection</b>             | 0 (0%) | 1 (0-2%) | 0 (0%)   | 0 (0%) | 0 (0%)   | 0 (0%)   | 0 (0%)   | 0 (0%) |
| <b>Status epilepticus</b>                   | 0 (0%) | 0 (0%)   | 0 (0%)   | 0 (0%) | 0 (0%)   | 0 (0%)   | 1 (0-2%) | 0 (0%) |
| <b>Stress urinary incontinence</b>          | 0 (0%) | 0 (0%)   | 0 (0%)   | 0 (0%) | 0 (0%)   | 1 (0-2%) | 0 (0%)   | 0 (0%) |
| <b>Subdural haemorrhage</b>                 | 0 (0%) | 1 (0-2%) | 0 (0%)   | 0 (0%) | 0 (0%)   | 0 (0%)   | 0 (0%)   | 0 (0%) |
| <b>Subileus</b>                             | 0 (0%) | 1 (0-2%) | 0 (0%)   | 0 (0%) | 0 (0%)   | 0 (0%)   | 0 (0%)   | 0 (0%) |
| <b>Substance-induced psychotic disorder</b> | 0 (0%) | 0 (0%)   | 0 (0%)   | 0 (0%) | 0 (0%)   | 1 (0-2%) | 0 (0%)   | 0 (0%) |

|                                           |        |          |        |        |          |          |          |        |
|-------------------------------------------|--------|----------|--------|--------|----------|----------|----------|--------|
| <b>Thrombosis</b>                         | 0 (0%) | 2 (0.4%) | 0 (0%) | 0 (0%) | 1 (0.2%) | 1 (0.2%) | 0 (0%)   | 0 (0%) |
| <b>Thrombosis in device</b>               | 0 (0%) | 0 (0%)   | 0 (0%) | 0 (0%) | 3 (0.6%) | 1 (0.2%) | 0 (0%)   | 0 (0%) |
| <b>Tooth infection</b>                    | 0 (0%) | 0 (0%)   | 0 (0%) | 0 (0%) | 4 (0.8%) | 1 (0.2%) | 0 (0%)   | 0 (0%) |
| <b>Toxic hepatitis</b>                    | 0 (0%) | 0 (0%)   | 0 (0%) | 0 (0%) | 0 (0%)   | 1 (0.2%) | 0 (0%)   | 0 (0%) |
| <b>Transient ischaemic attack</b>         | 0 (0%) | 0 (0%)   | 0 (0%) | 0 (0%) | 0 (0%)   | 1 (0.2%) | 0 (0%)   | 0 (0%) |
| <b>Upper gastrointestinal haemorrhage</b> | 0 (0%) | 0 (0%)   | 0 (0%) | 0 (0%) | 0 (0%)   | 1 (0.2%) | 0 (0%)   | 0 (0%) |
| <b>Ureteric obstruction</b>               | 0 (0%) | 1 (0.2%) | 0 (0%) | 0 (0%) | 0 (0%)   | 0 (0%)   | 0 (0%)   | 0 (0%) |
| <b>Urinary tract obstruction</b>          | 0 (0%) | 1 (0.2%) | 0 (0%) | 0 (0%) | 0 (0%)   | 0 (0%)   | 0 (0%)   | 0 (0%) |
| <b>Urosepsis</b>                          | 0 (0%) | 0 (0%)   | 0 (0%) | 0 (0%) | 0 (0%)   | 1 (0.2%) | 0 (0%)   | 0 (0%) |
| <b>Uterine cancer</b>                     | 0 (0%) | 0 (0%)   | 0 (0%) | 0 (0%) | 0 (0%)   | 1 (0.2%) | 0 (0%)   | 0 (0%) |
| <b>Uterine haemorrhage</b>                | 0 (0%) | 0 (0%)   | 0 (0%) | 0 (0%) | 0 (0%)   | 1 (0.2%) | 0 (0%)   | 0 (0%) |
| <b>Venous embolism</b>                    | 0 (0%) | 1 (0.2%) | 0 (0%) | 0 (0%) | 0 (0%)   | 0 (0%)   | 0 (0%)   | 0 (0%) |
| <b>Vocal cord paralysis</b>               | 0 (0%) | 0 (0%)   | 0 (0%) | 0 (0%) | 1 (0.2%) | 1 (0.2%) | 0 (0%)   | 0 (0%) |
| <b>Wrist fracture</b>                     | 0 (0%) | 0 (0%)   | 0 (0%) | 0 (0%) | 0 (0%)   | 0 (0%)   | 1 (0.2%) | 0 (0%) |

**Table S3: Summary of safety events in patients who crossed over from Capecitabine plus lapatinib to trastuzumab emtansine**

|                                   | Trastuzumab emtansine (n=136) |              |
|-----------------------------------|-------------------------------|--------------|
|                                   | All grades                    | Grade 3 or 4 |
| Epistaxis                         | 36 (26.5%)                    | 0 (0%)       |
| Nausea                            | 35 (25.7%)                    | 0 (0%)       |
| Fatigue                           | 30 (22.1%)                    | 2 (1.5%)     |
| Headache                          | 28 (20.6%)                    | 1 (0.7%)     |
| Increased AST                     | 25 (18.4%)                    | 2 (1.5%)     |
| Asthenia                          | 24 (17.6%)                    | 4 (2.9%)     |
| Thrombocytopenia                  | 23 (16.9%)                    | 6 (4.4%)     |
| Constipation                      | 22 (16.2%)                    | 0 (0%)       |
| Arthralgia                        | 21 (15.4%)                    | 0 (0%)       |
| Decreased appetite                | 21 (15.4%)                    | 2 (1.5%)     |
| Diarrhoea                         | 20 (14.7%)                    | 1 (0.7%)     |
| Dry mouth                         | 20 (14.7%)                    | 0 (0%)       |
| Pyrexia                           | 20 (14.7%)                    | 0 (0%)       |
| Cough                             | 18 (13.2%)                    | 0 (0%)       |
| Dyspnoea                          | 17 (12.5%)                    | 0 (0%)       |
| Rash                              | 17 (12.5%)                    | 1 (0.7%)     |
| Myalgia                           | 16 (11.8%)                    | 0 (0%)       |
| Peripheral neuropathy             | 16 (11.8%)                    | 0 (0%)       |
| Increased ALT                     | 14 (10.3%)                    | 0 (0%)       |
| Insomnia                          | 14 (10.3%)                    | 0 (0%)       |
| Upper respiratory tract infection | 14 (10.3%)                    | 0 (0%)       |
| Anaemia                           | 11 (8.1%)                     | 4 (2.9%)     |
| Increased GGT                     | 4 (2.9%)                      | 3 (2.2%)     |

This table shows adverse events that occurred during crossover treatment with trastuzumab emtansine in patients who crossed over from treatment with capecitabine plus lapatinib to trastuzumab emtansine. All adverse events (grades 1–5) that occurred in at least 10% of patients and all grade 3–4 events that occurred in at least 2% of patients are listed. There were no grade 5 adverse events.
